# Supplementary material for: A host-microbiome interaction mediates the opposing effects of omega-6 and omega-3 fatty acids on metabolic endotoxemia
Source: PubMed Central journal article supplement (PMC4650612; doi:10.1038/srep11276), 2015-06-11
Supplement: srep11276-s1.pdf [file srep11276-s1.pdf]

# A host-microbiome interaction mediates the opposing effects of omega-6 and omega-3 fatty acids on metabolic endotoxemia

Kanakaraju Kaliannan, Bin Wang, Xiang-Yong Li, Kui-Jin Kim, Jing X. Kang\*

Laboratory of Lipid Medicine and Technology, Department of Medicine, Massachusetts General Hospital and Harvard Medical School, Boston, MA 02129, USA

## Supplementary Information

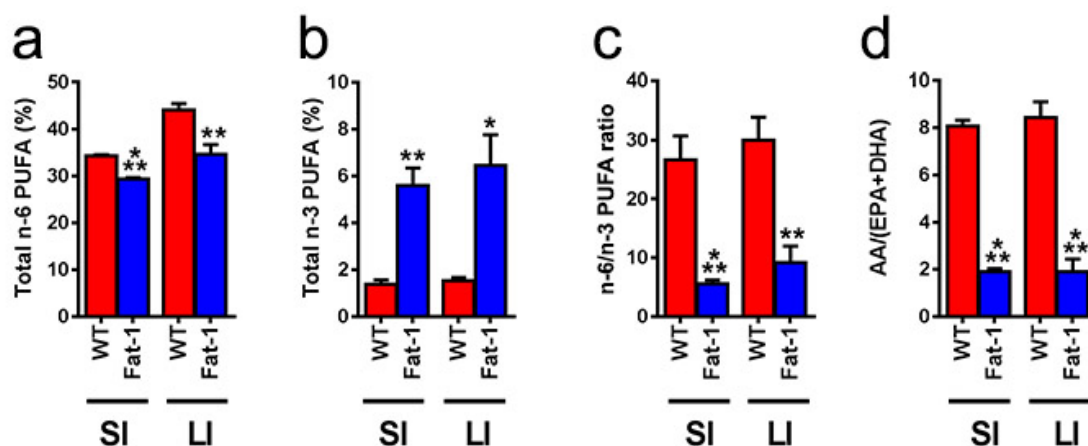

**Supplementary Fig. S1. Differential fatty acid profiles of the small (SI) and large (LI) intestinal tissue from 8 month old WT (n=4), *Fat-1* transgenic mice (n=5).** Percentages of total n-6 PUFA (a) and n-3 PUFA (b) and the ratios of tissue n-6/n-3 PUFA (c) and AA/(EPA+DHA) (d), as determined by gas chromatography. Values are expressed as mean  $\pm$  SE. Significance was determined by unpaired two-tailed student T-test. (\* $P < 0.05$ , \*\* $P < 0.01$ , \*\*\* $P < 0.001$ ).

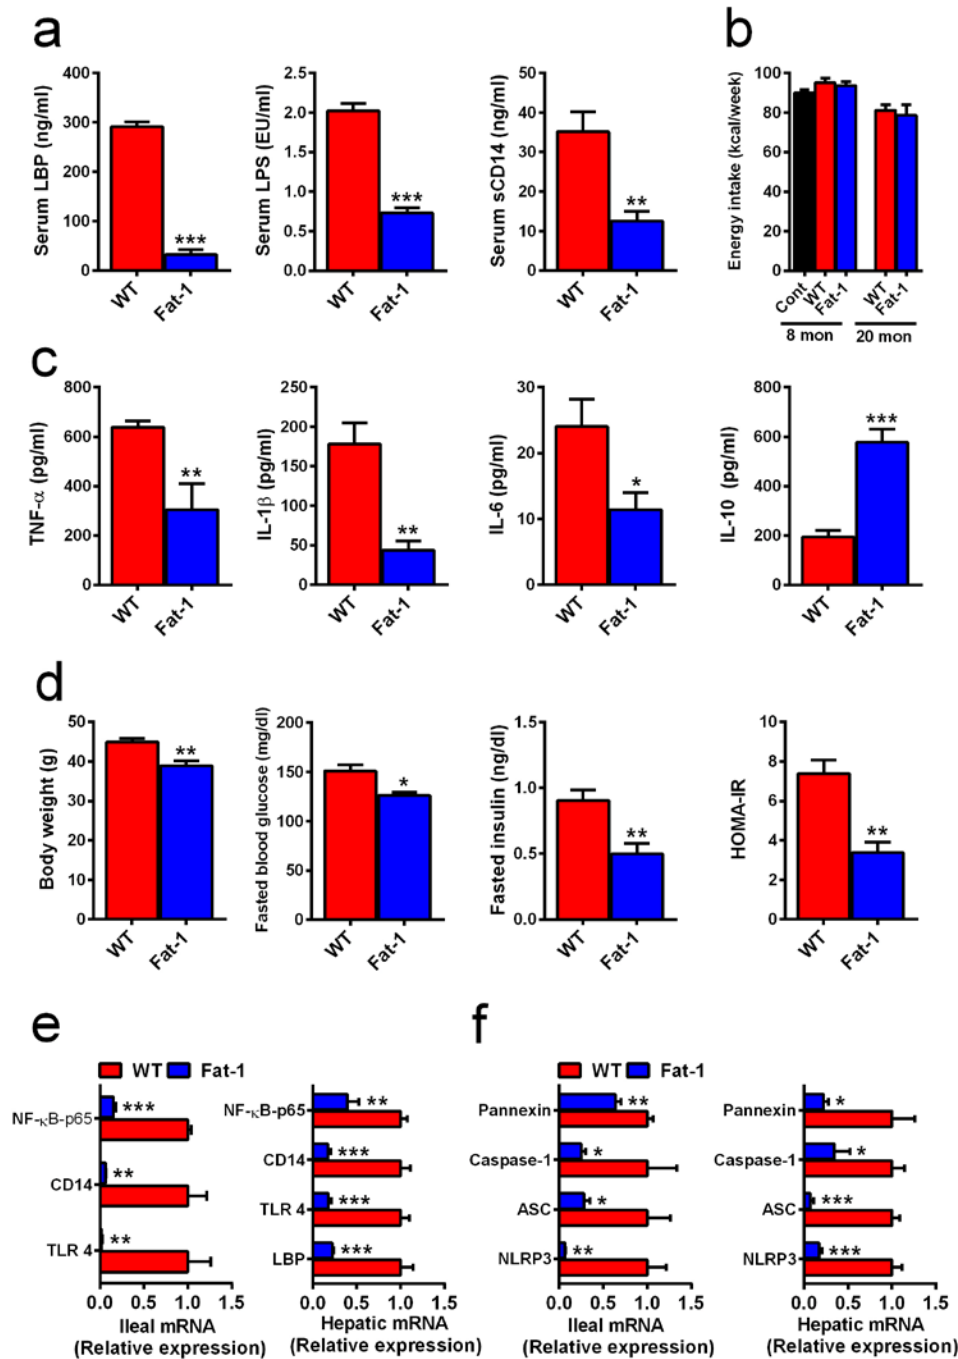

**Supplementary Fig. S2. Endogenous conversion of omega-6 to omega-3 fatty acids reduces metabolic endotoxemia and systemic low grade inflammation in aged mice.** Twenty month old WT (n=7) and fat-1 (n=5) littermates were maintained on a high n-6 (10% corn oil) after weaning. Blood and tissue samples were collected from all the mice at the same time and subjected to various analyses. **(a)** Parameters of metabolic endotoxemia (LPS, LBP and sCD14); **(b)** Energy intake; **(c)** Serum levels of inflammatory cytokines (TNF- $\alpha$ , IL-1 $\beta$ , IL-6 and IL-10) and **(d)** Markers of metabolic syndrome (body weight, fasting blood glucose, fasting insulin, and HOMA-IR); **(e)** Expression levels of LPS pathway related factors (LBP, CD14, Toll like Receptor 4 and NF $\kappa$ B-p65) in ileum and liver; **(f)** Expression levels of factors related to LPS-NLRP3 inflammasome pathway (NLRP3, ASC, Caspase 1 and Pannexin) in ileum and liver. Data are expressed as mean  $\pm$  SE. Significance was determined by unpaired two-tailed student T-test. \* $P < 0.05$ ; \*\* $P < 0.01$ ; \*\*\* $P < 0.001$ .

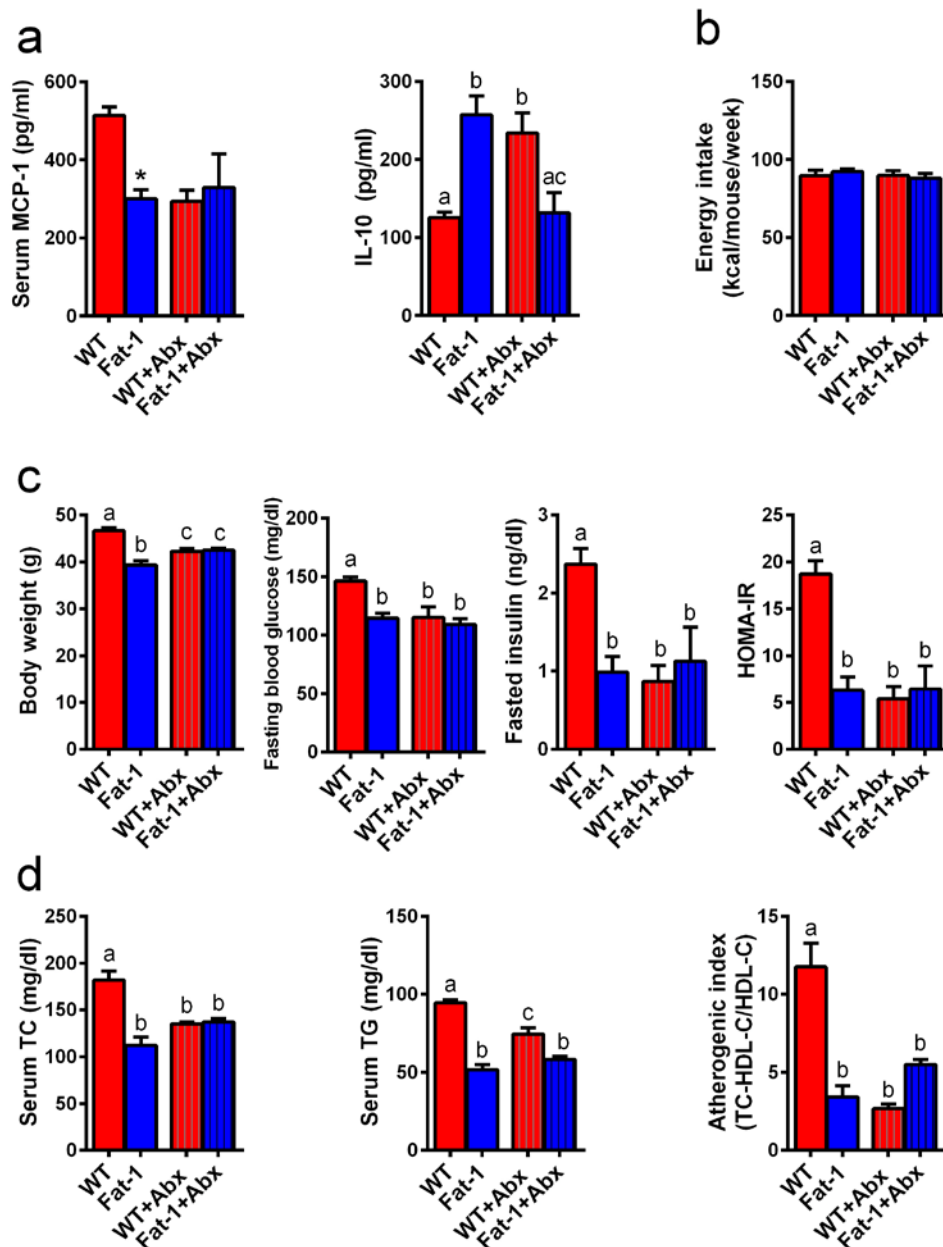

**Supplementary Fig. S3. Antibiotic treatment alters the effects of tissue omega-6 and omega-3 PUFA status on metabolic endotoxemia, chronic low grade inflammation and metabolic syndrome.**

Separately housed male 10-month-old WT (n=10) and fat-1 (n=10) were maintained on the same high n-6 diet, and half of them in each group received a broad spectrum antibiotic cocktail (Abx) consisting of Ampicillin (1g/L), Vancomycin (500mg/L), Neomycin sulfate (1g/L) (added to drinking water) and Metronidazole (100mg/kg) (orally gavaged every 12 h) for about 2 months. **(a)** Serum MCP-1 and IL-10 levels; **(b)** Energy intake; **(c)** Metabolic parameters including body weight, fasting blood glucose, fasting serum insulin, and HOMA-IR; **(d)** serum lipid profile with atherogenic index. Data are expressed as mean  $\pm$  SE. Data with different superscript letters are significantly different ( $P < 0.05$ ) according to one-way ANOVA with Tukey Test.

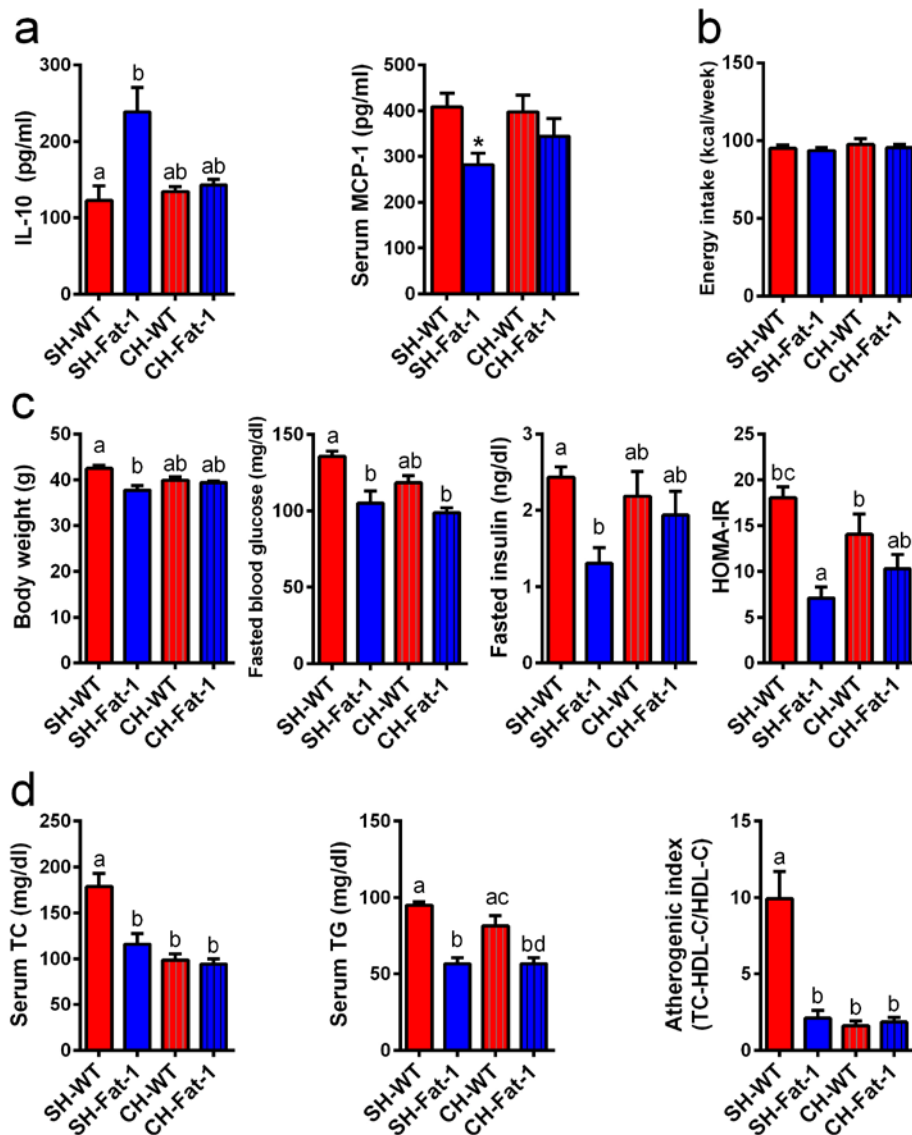

**Supplementary Fig. S4. Co-housing of animals (WT+Fat-1) alleviates the differences between WT and fat-1 mice in metabolic endotoxemia, chronic low grade inflammation and metabolic syndrome.** For the co-housing experiments, fat-1 (n=4) and WT littermates (n=4) were co-housed in two cages (2 mice from each genotype / cage) and fed an identical high n-6 diet for 8 months after weaning. **(a)** Serum MCP-1 and IL-10 levels; **(b)** Energy intake; **(c)** Metabolic parameters including body weight, fasting blood glucose, fasting serum insulin, and HOMA-IR, and **(d)** Serum lipid profile with atherogenic index. Data are expressed as mean  $\pm$  SE. Data with different superscript letters are significantly different ( $P < 0.05$ ) according to one-way ANOVA with Tukey Test. SH, separately housed; CH, co-housed.

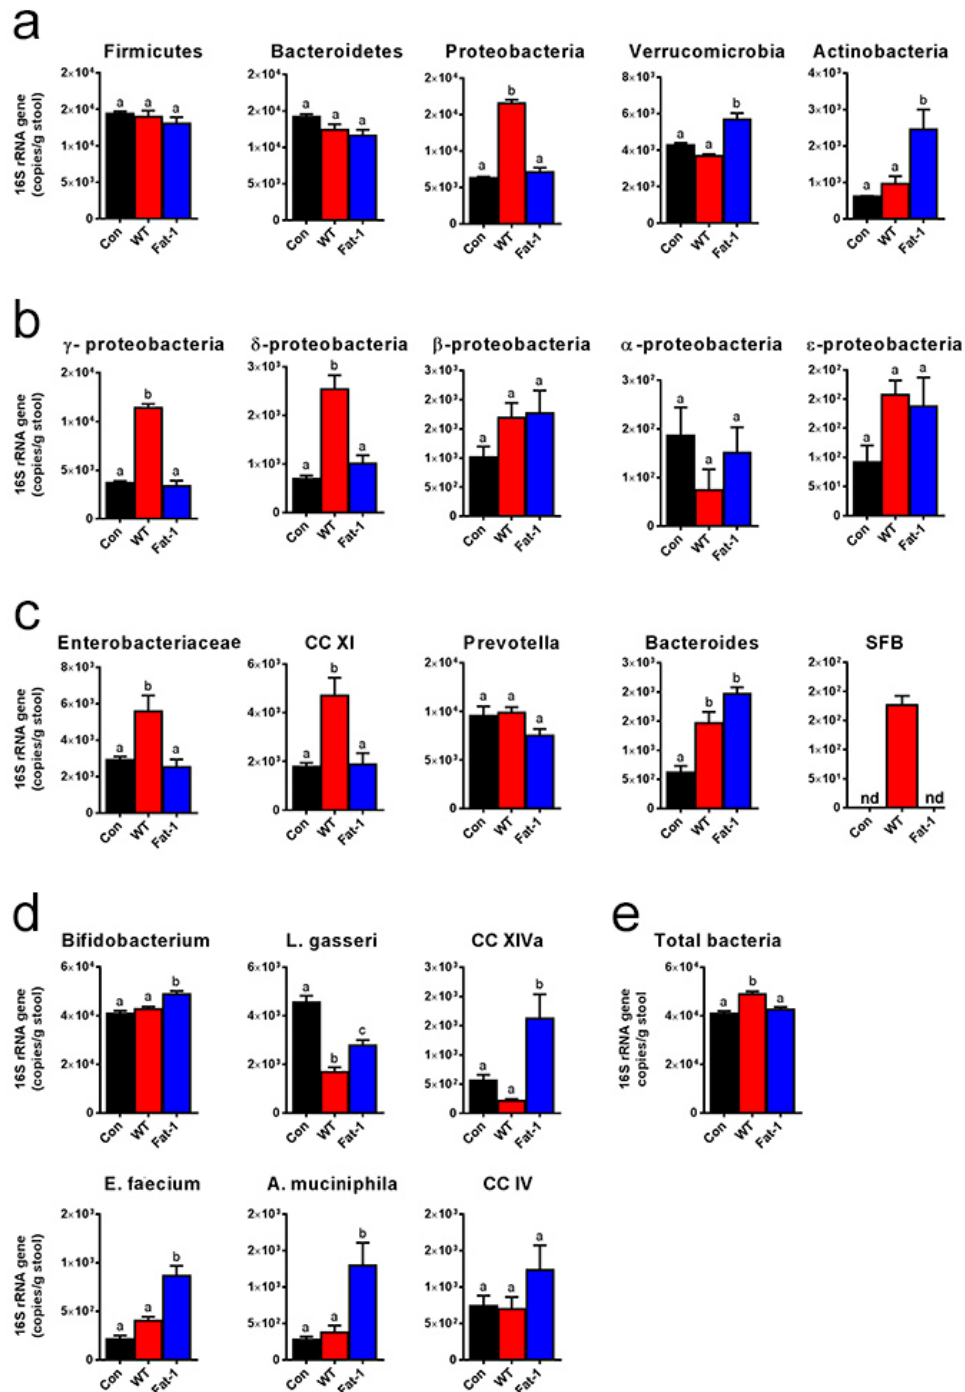

**Supplementary Fig. S5. Ongoing effects of tissue n-6 and n-3 PUFA on gut microbiota.** Eight-month-old WT (n=10) and fat-1 (n=10) were maintained on the same high n-6 diet since weaning. A group of WT mice fed with a chow diet (n=10) was used as the control group. Stool samples from all groups of mice were subjected to quantification of microbiota by qPCR. **(a)** Copy numbers of five most dominant phyla in the stool between groups; **(b)** Major classes of LPS producing *Proteobacteria* phylum between groups; **(c)** Groups of LPS producing and/or pro-inflammatory bacteria at sub-phylum level; **(d)** Groups of LPS suppressing and/or anti-inflammatory bacteria at sub-phylum level; **(e)** Total bacteria. Data are expressed as mean  $\pm$  SE. Data with different superscript letters are significantly different ( $P < 0.05$ ) according to one-way ANOVA with Tukey Test.

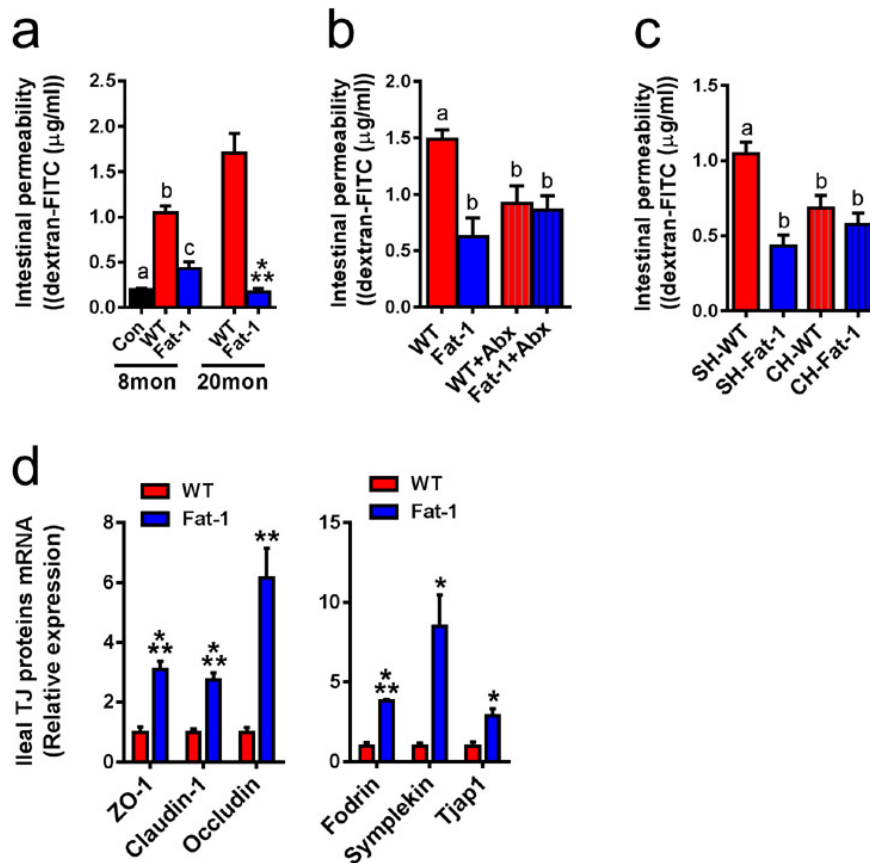

**Supplementary Fig. S6. Effect of tissue n-6 and n-3 PUFA status on intestinal permeability and expression of tight junction proteins.** (a) Difference in intestinal permeability between WT and fat-1 mice at the age of 8 months and 20 months; (b) Effect of antibiotics treatment on the difference in intestinal permeability between WT and fat-1 mice; (c) Effect of co-housing on the difference in intestinal permeability between WT and fat-1 mice; (d) Small intestinal mRNA expression of tight junction proteins (Zonulin-1, Claudin-1, Occludin, Fodrin, Symplekin and Tjap1) in the 20 month old WT and fat-1 mice. Data are expressed as mean  $\pm$  SE. Data with different superscript letters are significantly different ( $P < 0.05$ ) according to one-way ANOVA with Tukey Test, or \*  $P < 0.05$ ; \*\*  $P < 0.01$ ; \*\*\*  $P < 0.001$ .

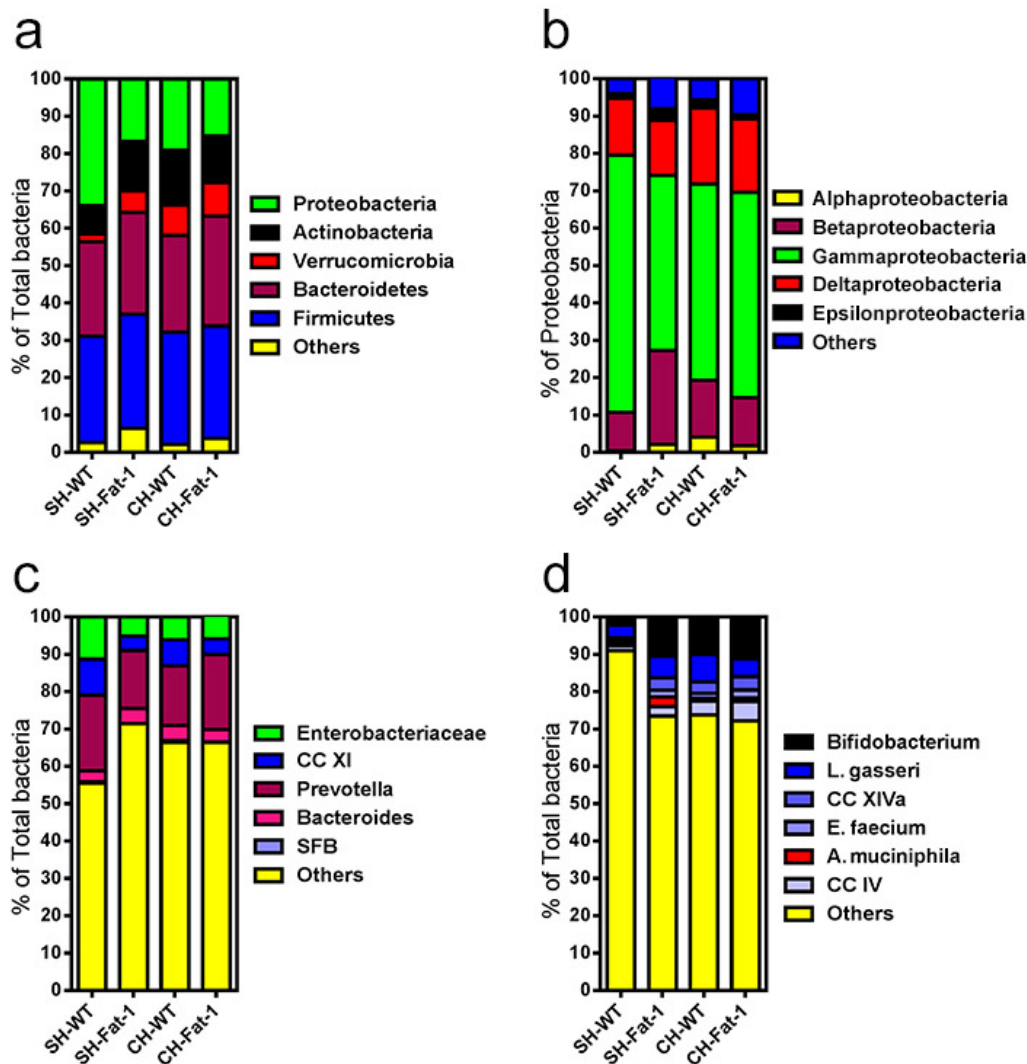

**Supplementary Fig. S7. Co-housing of animals (WT+Fat-1) alleviates the differences between WT and fat-1 mice in LPS related gut microbiota profile (Part 1: Relative abundance by percentage).** Stool samples were collected from separately housed (SH) mice and from 8-month co-housing (CH) mice and subjected to quantification of microbiota by qPCR. **(a)** Relative abundance for the 5 most dominant phylums in the stool between groups; **(b)** Relative abundance of the major classes of LPS-producing *Proteobacteria* phylum between groups; **(c)** Relative abundance of the major groups of LPS-producing and/or pro-inflammatory bacteria at the sub-phylum level; and **(d)** Relative abundance of major groups of LPS-suppressing and/or anti-inflammatory bacteria at the sub-phylum level.

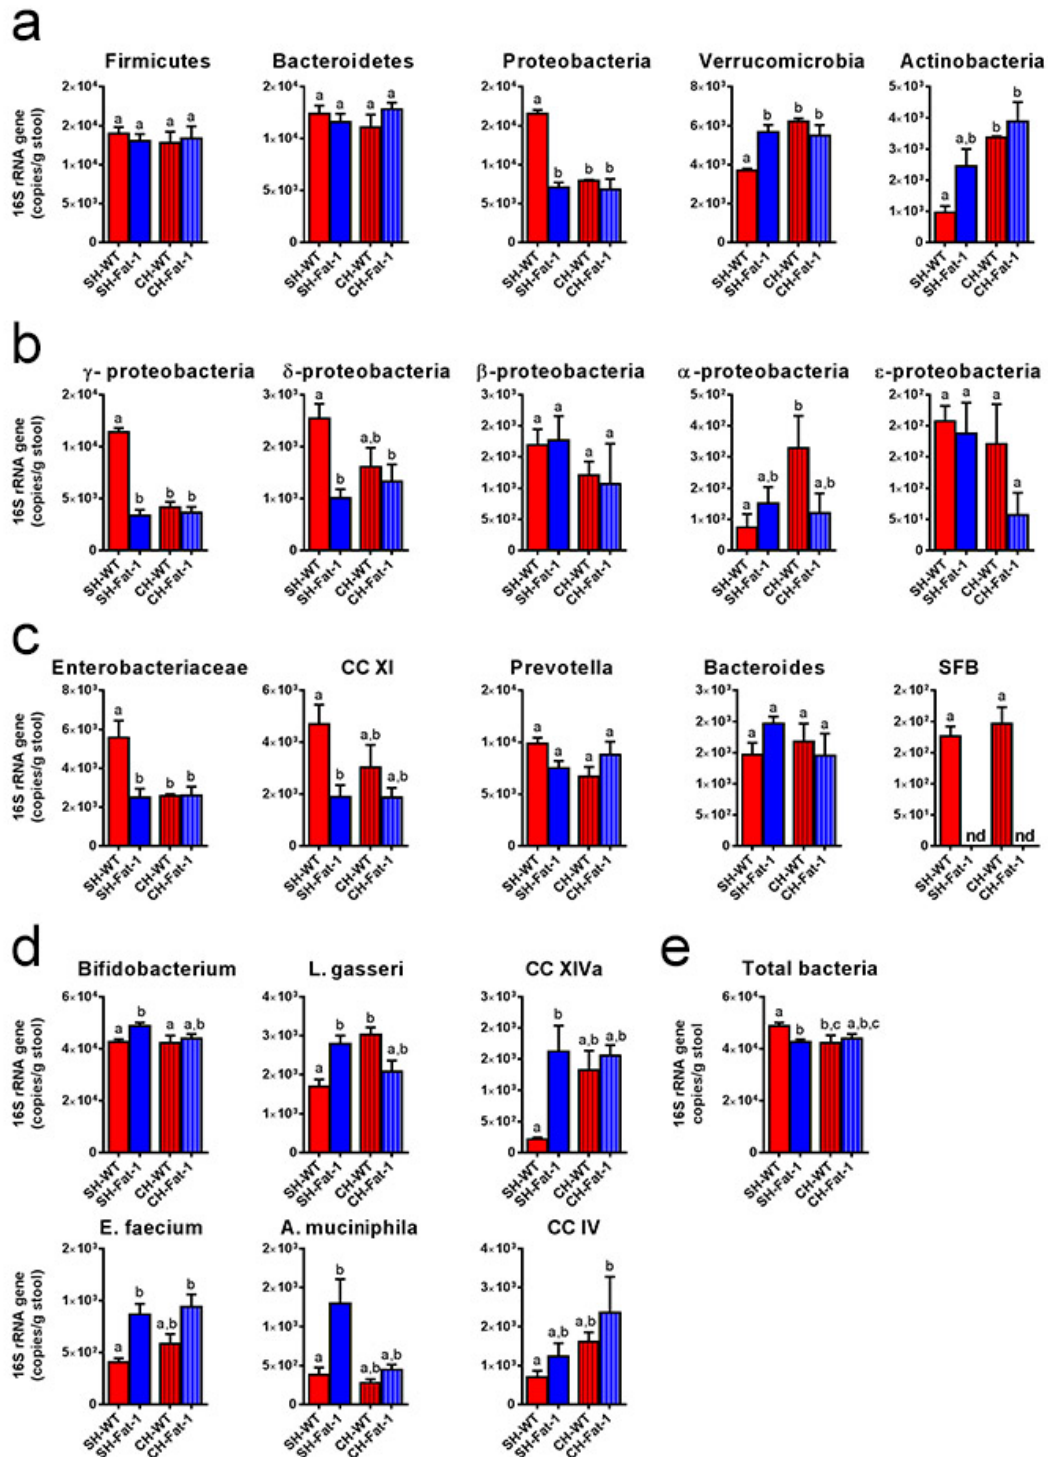

**Supplementary Fig. S8. Co-housing of animals (WT+Fat-1) alleviates the differences between WT and fat-1 mice in LPS related gut microbiota profile (Part 2: Absolute copy number).** Stool samples were collected from 8-month-old separately housed (SH) mice and co-housed (CH) mice, and subjected to quantification of microbiota by qPCR. **(a)** Copy numbers of five most dominant phylums in the stool between groups; **(b)** Major classes of LPS producing *Proteobacteria* phylum between groups; **(c)** Groups of LPS-producing and/or pro-inflammatory bacteria at sub-phylum level; **(d)** Groups of LPS-suppressing and/or anti-inflammatory bacteria at sub-phylum level; **(e)** Total bacteria. Data are expressed as mean  $\pm$  SE. Data with different superscript letters are significantly different ( $P < 0.05$ ) according to one-way ANOVA with Tukey Test.



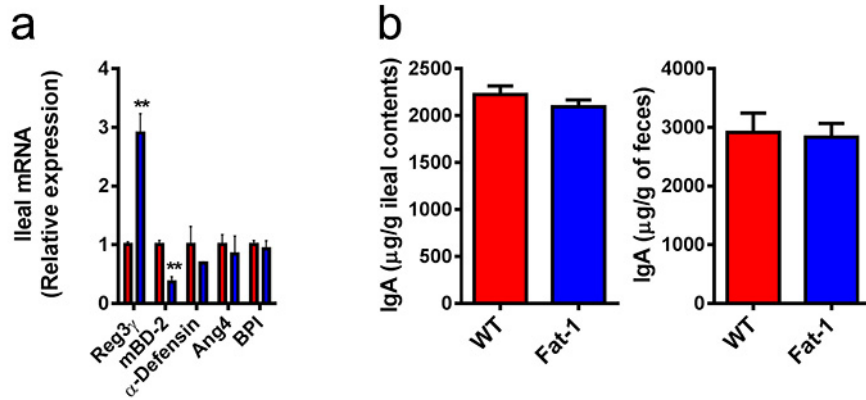

**Supplementary Fig. S9.** Separately housed 20 month old male WT (n=4) and fat-1 (n=5) were maintained on the same high n-6 PUFA diet since weaning. Ileal tissue and stool were collected from the mice and subjected to analysis for the levels of antimicrobial peptides, including Reg3 $\gamma$ , mBD-2,  $\alpha$ -defensin, Ang4 and BPI (**a**) and IgA (**b**). Data are expressed as mean  $\pm$  SE. Significance was determined by unpaired two-tailed student T-test. \* $P < 0.05$ ; \*\*  $P < 0.01$ ; \*\*\*  $P < 0.001$ .

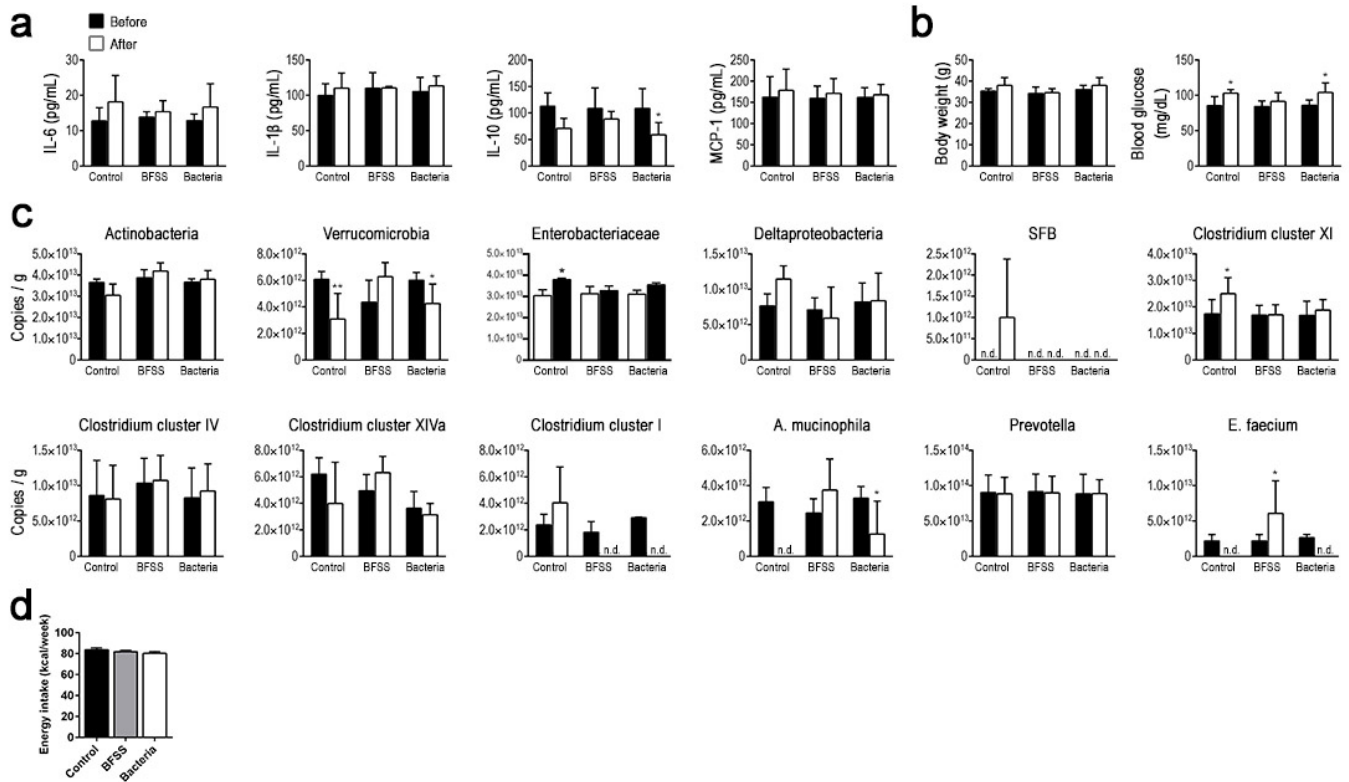

**Supplementary Fig. S10. Transfer of fecal components from fat-1 to WT mice affects gut microbiota composition and parameters of inflammation.** Fresh feces collected from fat-1 mice were separated into bacteria free stool supernatant (BFSS) and bacterial pellet fractions. The fecal BFSS and bacterial pellets from fat-1 mice were transferred by daily gavage or drinking water into WT mice that were simultaneously given a high n-6 diet. Two months after the treatments, the animals were subjected to analysis for changes in (a) markers of inflammation; (b) metabolic parameters; and (c) endotoxemia-related bacterial groups in the stool. (d) Energy intake. Data are expressed as mean  $\pm$  SE. Significance was determined by paired T-test. \*,  $P < 0.05$ ; \*\*,  $P < 0.01$ ; nd, not detectable.

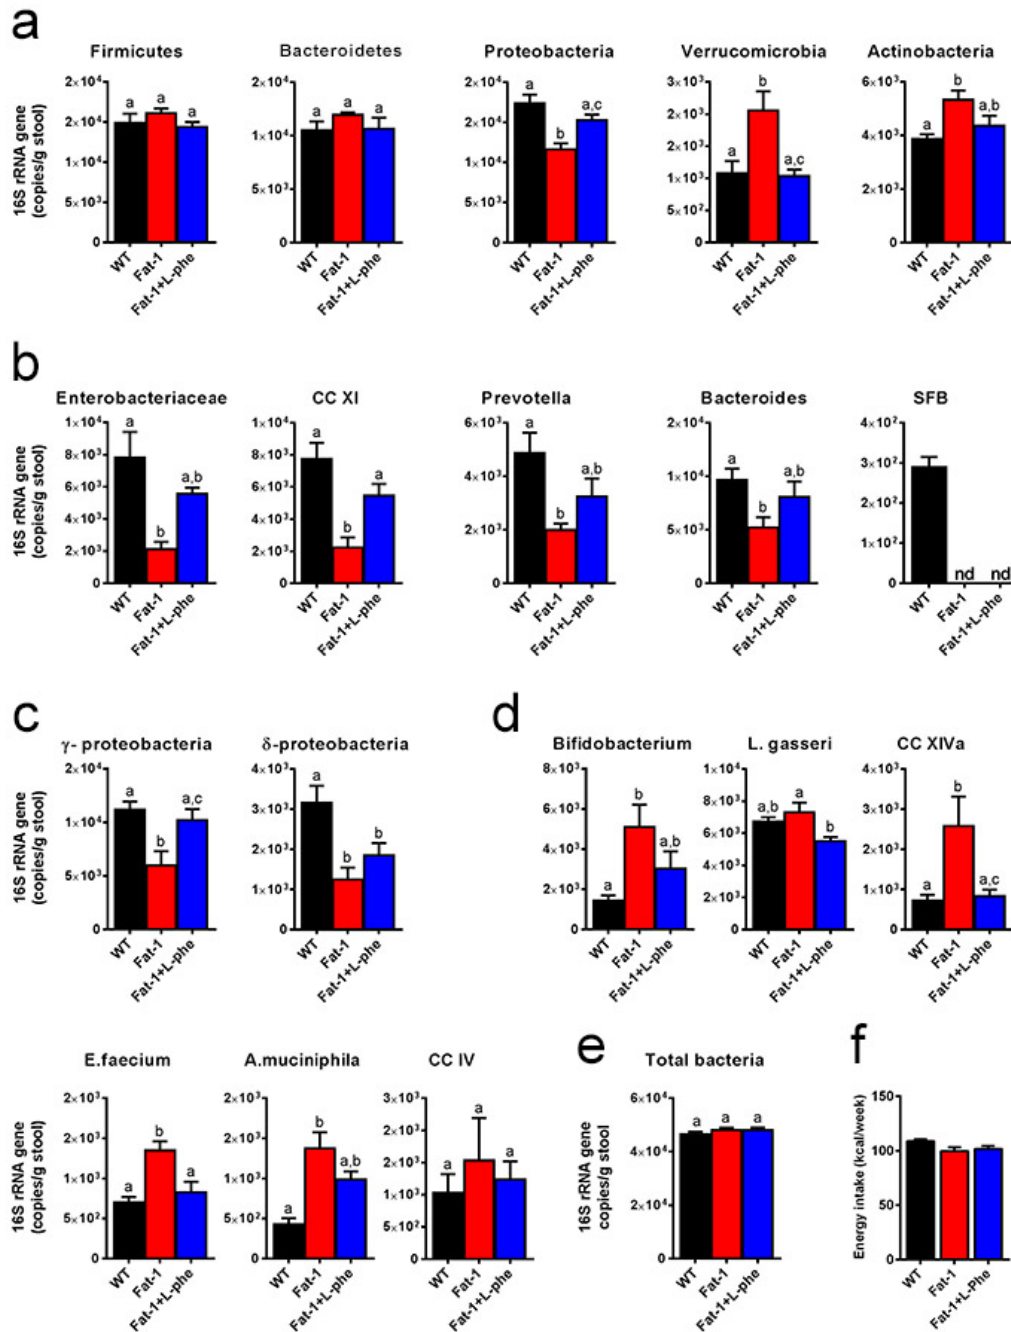

**Supplementary Fig. S11.** Inhibition of IAP in fat-1 mice was performed by adding an IAP-specific inhibitor (10Mm L-phenylalanine) to the drinking water of a subgroup of fat-1 mice for two months. The treated fat-1 mice (n=5) together with untreated fat-1 (n=5) and WT mice (n=5) were subjected to analysis for differences in the LPS related gut microbiota. **(a)** Copy numbers of the five most dominant phylums in the stool between groups; **(b)** Groups of LPS-producing and/or pro-inflammatory bacteria at sub-phylum level; **(c)** Major classes of LPS-producing *Proteobacteria* phylum between groups; **(d)** Major LPS-reducing bacteria; **(e)** Total bacteria; **(f)** Energy intake. Data are expressed as mean ± SE. Data with different superscript letters are significantly different ( $P < 0.05$ ) according to one-way ANOVA with Tukey Test.

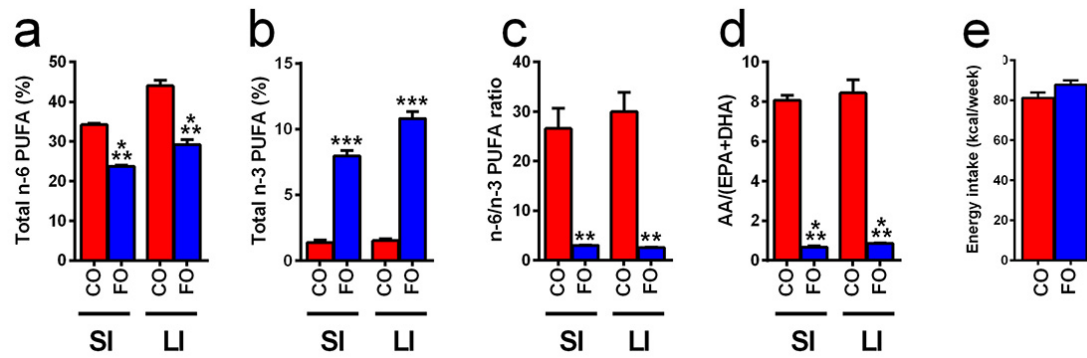

**Supplementary Fig. S12. Alteration fatty acid profiles of the small (SI) and large (LI) intestinal tissues by fish oil supplementation.** Twenty-month-old WT mice previously received a high n-6 PUFA (10% corn oil) diet were supplemented with n-3 PUFA (5% corn oil+5% fish oil) for 2 months. After sacrificing, small (SI) and large (LI) intestinal tissues were subjected to fatty acid analysis by gas chromatography. **(a)** Percentages of total n-6 PUFA; **(b)** Percentages of total n-3 PUFA; **(c)** Ratios of tissue n-6/n-3 PUFA; **(d)** AA/(EPA+DHA); **(e)** Energy intake. Values are expressed as mean  $\pm$  SE. Significance was determined by unpaired two-tailed student T-test. (\* $P < 0.05$ , \*\* $P < 0.01$ , \*\*\* $P < 0.001$ ).

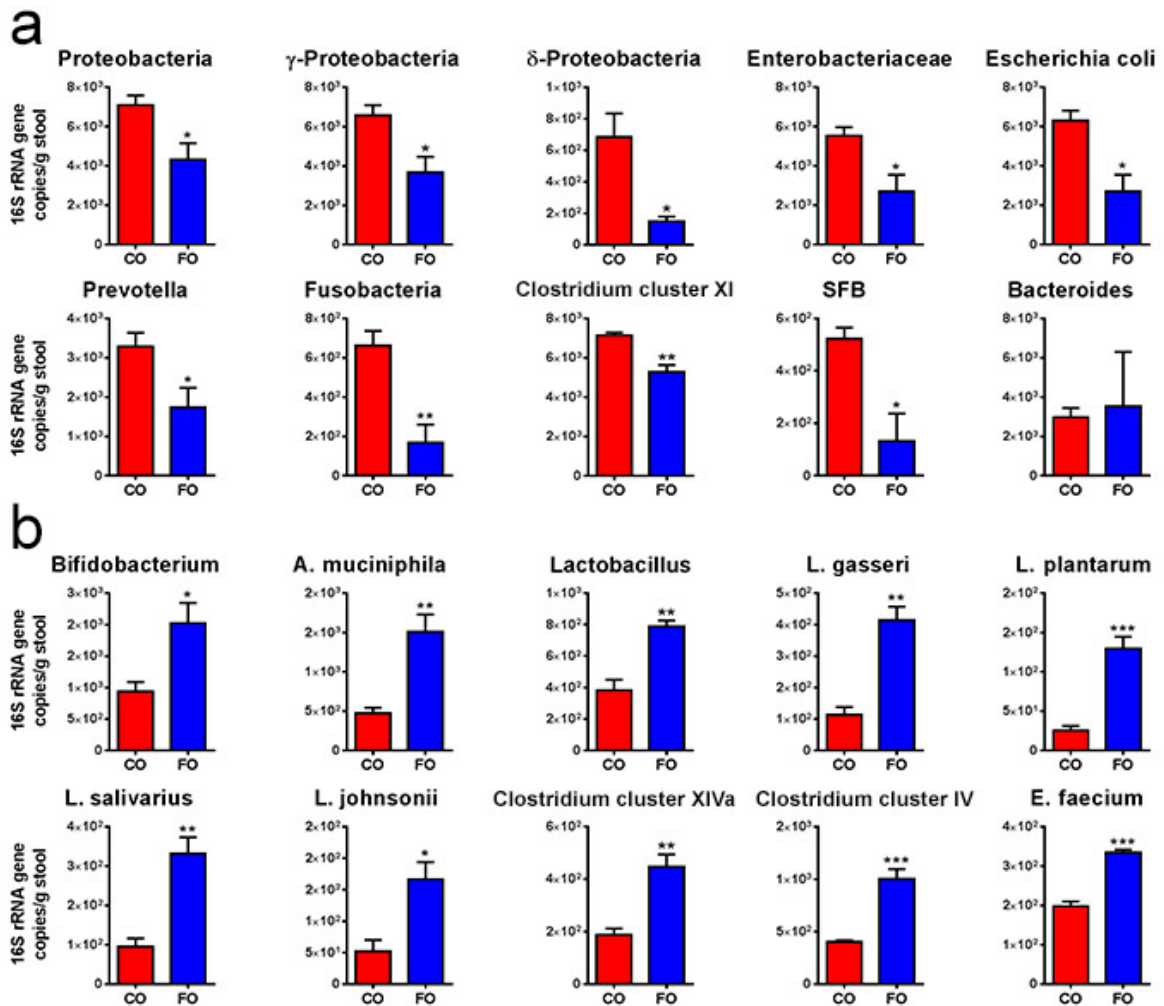

**Supplementary Fig. S13. Elevating tissue n-3 PUFA status by fish oil supplementation alters gut bacterial profile.** Twenty-month-old WT mice previously maintained on a high n-6 PUFA (10% corn oil) diet were supplemented with n-3 PUFA (5% corn oil+5% fish oil) for 2 months. Quantification of stool bacterial 16s rRNA copy numbers was determined by qPCR. **(a)** LPS-producing and/or pro-inflammatory bacteria; **(b)** LPS-reducing and/or anti-inflammatory bacteria. Values are expressed as mean  $\pm$  SE. Significance was determined by unpaired two-tailed student T-test. (\* $P < 0.05$ , \*\* $P < 0.01$ , \*\*\* $P < 0.001$ ). CO, corn oil; FO, fish oil.

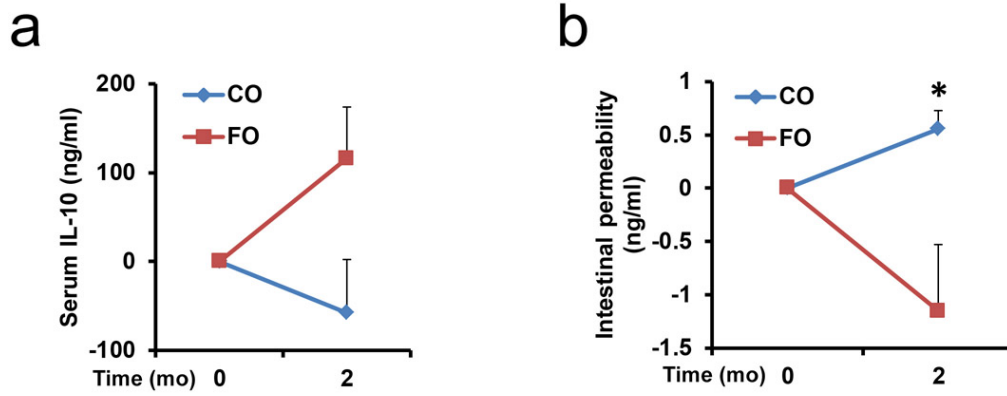

**Supplementary Figure S14. Change in serum IL-10 and intestinal permeability by fish oil supplementation.** Twenty-month-old WT mice previously maintained on a high n-6 PUFA (10% corn oil) diet were supplemented with n-3 PUFA (5% corn oil+5% fish oil) for 2 months. Serum was subjected to analysis of change in serum IL-10 (a) and intestinal permeability (b). Data are expressed as mean  $\pm$  SE. Significance was determined by unpaired two tailed student T-test \* $P < 0.05$ ; \*\* $P < 0.01$ ; \*\*\* $P < 0.001$ .

**Supplementary Table S1: Targeted LPS and inflammation-related gut microbiota.**

| Taxonomic rank | Target bacteria                | LPS producing | LPS suppressing | Pro-inflammatory | Anti-inflammatory | Related to MetS/Inflammation | Reference   |
|----------------|--------------------------------|---------------|-----------------|------------------|-------------------|------------------------------|-------------|
| Phylum         | <b>PROTEOBACTERIA</b>          | Yes           |                 | Yes              |                   | Yes                          | (14, 16-18) |
| Class          | $\alpha$ -proteobacteria       |               |                 |                  |                   |                              |             |
| Class          | $\beta$ -proteobacteria        |               |                 |                  |                   |                              |             |
| Class          | $\gamma$ -proteobacteria       |               |                 |                  |                   |                              |             |
| Class          | $\delta$ -proteobacteria       |               |                 |                  |                   |                              |             |
| Class          | $\epsilon$ -proteobacteria     |               |                 |                  |                   |                              |             |
| Family         | Enterobacteriaceae             |               |                 |                  |                   |                              |             |
| Genus          | Escherichia coli               |               |                 |                  |                   |                              |             |
| Phylum         | <b>ACTINOBACTERIA</b>          |               | Yes             |                  | Yes               | Yes                          | (19, 20)    |
| Genus          | Bifidobacterium                |               |                 |                  |                   |                              |             |
| Phylum         | <b>VERRUCOMICROBIA</b>         |               | Yes             |                  | Yes               | Yes                          | (21, 22)    |
| Species        | Akkermansia mucinophila        |               |                 |                  |                   |                              |             |
| Phylum         | <b>FUSOBACTERIA</b>            | Yes           |                 |                  |                   | Yes                          | (23, 24)    |
| Phylum         | <b>BACTERIODETES</b>           | Yes           |                 |                  |                   | Yes                          | (25)        |
| Genus          | Bacteroides                    | Yes           |                 |                  |                   | Yes                          | (14)        |
| Genus          | Prevotella                     | Yes           |                 |                  | Yes               |                              | (26)        |
| Phylum         | <b>FIRMICUTES</b>              |               |                 |                  |                   | Yes                          | (25)        |
| Genus          | Lactobacillus                  |               |                 |                  |                   |                              |             |
| Family         | Clostridium cluster XIVa       |               |                 |                  | Yes               | Yes                          | (27-29)     |
| Family         | Clostridium cluster IV         |               |                 |                  |                   |                              |             |
| Family         | Clostridium cluster I          |               |                 |                  |                   |                              |             |
| Family         | Roseburia                      |               |                 |                  |                   |                              |             |
| Genus          | Clostridium cluster XI         |               |                 | Yes              |                   | Yes                          |             |
| Species        | Segmented Filamentous Bacteria |               |                 | Yes              | Yes               | Yes                          | (14)        |
| Species        | Faecalibacterium prausnitzii   |               |                 |                  |                   | Yes                          | (30)        |
| Species        | Enterococcus faecium           |               | Yes             |                  |                   | Yes                          | (31)        |
| Species        | Lactobacillus gasseri          |               |                 |                  |                   |                              |             |
| Species        | Lactobacillus plantarum        |               | Yes             |                  | Yes               | Yes                          | (32)        |
| Species        | Lactobacillus johnsonii        |               | Yes             |                  | Yes               | Yes                          | (33, 34)    |
| Species        | Lactobacillus acidophilus      |               | Yes             |                  | Yes               | Yes                          | (34)        |
| Species        | Lactobacillus fermentum        |               | Yes             |                  | Yes               | Yes                          | (35)        |

**Supplementary Table S2: Fatty acid composition of experimental diets.**

| %               | Chow diet | High n-6 diet  | High n-3 diet               |
|-----------------|-----------|----------------|-----------------------------|
|                 |           | (10% corn oil) | (5% corn oil + 5% fish oil) |
| C6:0            |           |                |                             |
| C8:0            | 0.08      | 0.11           |                             |
| C10:0           | 0.1       | 0.27           | 0.03                        |
| C12:0           | 1.9       | 0.7            | 0.2                         |
| C14:0           |           |                | 0.12                        |
| C14:1           | 0.18      |                | 0.02                        |
| C16:1           | 2.43      | 0.5            | 0.18                        |
| C17:0           | 0.24      |                | 0.15                        |
| C17:1           | 0.13      |                |                             |
| C18:0           | 15.2      | 2.36           | 3.31                        |
| C18:1           | 13        | 28.2           | 13.9                        |
| C18:2           | 39.2      | 52.3           | 18                          |
| C18:3           | 4.07      | 1.1            | 0.91                        |
| C20:0           |           |                | 0.39                        |
| C20:1           | 0.39      |                | 1.44                        |
| C20:4           | 0.25      |                | 1.67                        |
| C20:5           | 1.49      |                | 31.7                        |
| C22:5           | 0.11      |                | 3.8                         |
| C22:6           | 0.84      |                | 18.8                        |
| <b>SFA</b>      | 37.9      | 18.2           | 9.37                        |
| <b>MUFA</b>     | 16.2      | 28.4           | 15.9                        |
| <b>PUFA</b>     | 45.9      | 53.4           | 74.8                        |
| <b>n-6 PUFA</b> | 39.4      | 52.3           | 19.7                        |
| <b>n-3 PUFA</b> | 6.51      | 1.1            | 55.2                        |
| <b>n-6/n-3</b>  | 6.05      | 47.6           | 0.36                        |



**Supplementary Table S3: Target organisms, reference bacterial genomic DNA, and oligonucleotide primers.**

| Taxonomic rank | Target organism                        | Reference bacterial genomic DNA®                                                            | Sequence 5' - 3'                                             |
|----------------|----------------------------------------|---------------------------------------------------------------------------------------------|--------------------------------------------------------------|
| Kingdom        | All bacteria                           | NR-2655- Escherichia coli K-12, Strain MG1655                                               | F. ACTCCTACGGGAGGCAGCAGT<br>R. ATTACCGCGGCTGCTGGC            |
| Phylum         | Firmicutes (Gram positive)             | HM-102D-Lactobacillus reuteri, Strain CF48-3A                                               | F. GGAGYATGTGGTTAATTTCGAAGCA<br>R. AGCTGACGACAACCATGCAC      |
|                | Genus Lactobacillus                    | HM-102D-Lactobacillus reuteri, Strain CF48-3A                                               | F. AGCAGTAGGAATCTTCCA<br>R. CAC CGC TAC ACA TGG AG           |
|                | Family Clostridium cluster XI          | NR-13592-Clostridium difficile, Isolate 1                                                   | F. TGACGGTACYNKRKGAGGAAGCC<br>R. ACTACGGTTRAGCCGTAGCCTTT     |
|                | Species Roseburia                      | HM-84D-Clostridiales (Deposited as Hespelliasp., Strain 3_1_39B/D5) Clostridiales bacterium | F. TACTGCATTGGAAGTGTCCG<br>R. CGGCACCGAAGAGCAAT              |
|                | Family Clostridium cluster XIVa        | HM-480D-Lachnospiraceae sp., Strain ACC2                                                    | F. GCGGTRCGGCAAGTCTGA<br>R. CCTCCGACACTCTAGTMCAGAC           |
|                | Family Clostridium cluster IV          | HM-84D-Clostridiales (Deposited as Hespelliasp., Strain 3_1_39B/D5) Clostridiales bacterium | F. GCACAAGCAGTGGAGT<br>R. CTTCTCGTTTTGTCAA                   |
|                | Family Clostridium cluster I           | HM-310D-Clostridium perfringens, Strain WAL-14572                                           | F. AAAGGAAGATTAATACCGCATA<br>R. TTCTTCTAATCTCTACGCA          |
|                | Species Segmented Filamentous Bacteria | HM-36D-Clostridium sp., Strain 7_2_43FAA                                                    | F. GACGCTGAGGCATGAGACGA<br>R. GACGGCACGGATTGTATTC            |
|                | Species Faecalibacterium prausnitzii   | HM-473 Faecalibacterium prausnitzii KLE1255                                                 | F. CCATGAATTGCCTTCAAAGTGT<br>R. GAGCCTCAGCGCTCAGTTGGT        |
|                | Species Enterococcus faecium           | HM-204D-Enterococcus faecium, Strain TX1330                                                 | F. TGCTCCACCGGAAAAAGA<br>R. CACCAACTAGCTAATGCA               |
|                | Species Lactobacillus gasseri          | HM-104D-Lactobacillus gasseri, Strain JV-V03                                                | F. TGGAACACAGRTGCTAATACCGR.<br>CAGTTACTACCTCTATCTTTCTTCACTAC |
|                | Species Lactobacillus johnsonii        | HM-643 Lactobacillus johnsonii 135-1-CHN                                                    | F. CAAAAACCAACTTTCTATGTG<br>R. TTAATAGTGGCTACCCATA           |
|                | Species Lactobacillus plantarum        | HM-261 Lactobacillus plantarum KCA-1                                                        | F. CTCTGGTATTGATTGGTGCTTGCAT<br>R. GTTCGCCACTCACTCAATGTAAA   |
|                | Species Lactobacillus salivarius       | HM-228 Lactobacillus sp. 7_1_47FAA                                                          | F. CGAAACTTTCTTACACCGAATGC<br>R. GTCCATTGTGGAAGATTCCTC       |
|                | Species Lactobacillus acidophilus      | HM-228 Lactobacillus sp. 7_1_47FAA                                                          | F. GCAGATCGCATGATCAGCTTATA<br>R. TCAGTCTCTCAACTCGGCTATG      |
|                | Species Lactobacillus fermentum        | HM-228 Lactobacillus sp. 7_1_47FAA                                                          | F. AACCGAGAACACCGCGTTAT<br>R. ACTTAACCTTACTGATCGTAGATCAGTCA  |
| Phylum         | Bacteroidetes (Gram negative)          | HM-23D-Bacteroides sp., Strain 1_1_6                                                        | F. GGARCATGTGGTTAATTTCGATGAT<br>R. AGCTGACGACAACCATGCAG      |
|                | Genus Bacteroides                      | HM-23D-Bacteroides sp., Strain 1_1_6                                                        | F. AAGGTCCCCCACATTGG<br>R. GAGCCGCAAACTTTCACAA               |
|                | Genus Prevotella                       | HM-80D-Prevotella melaninogenica, Strain D18                                                | F. GGTCTGAGAGGAAGTCCCC<br>R. TCCTGCACGCTACTTGGCTG            |
| Phylum         | Proteobacteria (Gram negative)         | NR-2655-Escherichia coli K-12, Strain MG1655                                                | F. CATGACGTTACCCGAGAAGAAG<br>R. CTCTACGAGACTCAAGCTTGC        |
|                | Class α-Proteobacteria                 | NR-10486-Rickettsia sibirica, Strain 246                                                    | F. CIAGTGTAGAGGTGAAATT<br>R. CCCCGTCAATTCCTTTGAGTT           |
|                | Class β-Proteobacteria                 | NR-2655-Escherichia coli K-12, Strain MG1655                                                | F. GGGGAATTTGGACAATGGG<br>R. ACGCATTTCAGTCTACACG             |
|                | Class γ-Proteobacteria                 | NR-2655-Escherichia coli K-12, Strain MG1655                                                | F. CMATRCGCGTGTGTGAA<br>R. ACTCCCAGGCGGTCDACTTA              |
|                | Class δ-Proteobacteria                 | HM-66D-Desulfovibrio sp., Strain 3_1_syn3                                                   | F. GGTGTAGGAGTGAARTCCGT<br>R. TACGTGTGTAGCCCTRGRC            |
|                | Class ε-Proteobacteria                 | NR-4119-Campylobacter jejuni, Strain UA466                                                  | F. TGGTGTAGGGTAAAATCCG<br>R. AGGTAAGGTTCTTCGYGTATC           |
|                | Family Enterobacteriaceae              | NR-2655-Escherichia coli K-12, Strain MG1655                                                | F. GTGCCAGCAGCCGCGGTAA<br>R. GCCTCAAGGCGACAACCTCCAAG         |
|                | Genus Escherichia coli                 | NR-2655-Escherichia coli K-12, Strain MG1655                                                | F. CATGCCGCGTGTATGAAGAA<br>R. CGGGTAACGTCATGAGCAAAA          |
| Phylum         | Actinobacteria (Gram positive)         | HM-30D-Bifidobacterium sp., Strain 12_1_47BFAA                                              | F. CGCGGCTATCAGCTTGTG<br>R. CCGTACTCCCAGGCGGGG               |
|                | Genus Bifidobacterium                  | HM-30D-Bifidobacterium sp., Strain 12_1_47BFAA                                              | F. CGGGTGTAGTAAATCGGTGACC<br>R. TGATAGGACGCGACCCCA           |
| Phylum         | Verrucomicrobia (Gram negative)        | Akkermansia muciniphila Derrien et al (ATCC® BAA-835D5™) #                                  | F. GAATTCTCGGTGTAGCA<br>R. GGATTGTAGTACGTGTGCA               |
|                | Species Akkermansia muciniphila        | Akkermansia muciniphila Derrien et al (ATCC® BAA-835D5™) #                                  | F. CAGCACGTGAAGTGGGGAC<br>R. CCTTGGCGTTGGCTTCAGAT            |
| Phylum         | Fusobacteria (Gram negative)           | HM-260D-Fusobacterium nucleatum subsp. polymorphum, Strain F0401                            | F. GATCCAGCAATTCTGTGTGC<br>R. CGAATTTACCTCTACACTTGT          |

@ - Reagent was obtained through BEI Resources, NIAID, NIH as part of the Human Microbiome Project.

# - Reagent was ordered from American Type Culture Collection (ATCC), VA, USA.

**Supplementary Table S4: Primer sets used for real-time quantitative PCR.**

| <b>Gene</b>        | <b>Forward primer (Sequence 5' - 3')</b> | <b>Reverse primer (Sequence 5' - 3')</b> |
|--------------------|------------------------------------------|------------------------------------------|
| ZO-1               | TCTACGAGGGACTGTGGATG                     | TCAGATTCAGCAAGGAGTCG                     |
| Claudin-1          | TCTACGAGGGACTGTGGATG                     | TCAGATTCAGCAAGGAGTCG                     |
| Occludin           | ACCCGAAGAAAGATGGATCG                     | CATAGTCAGATGGGGGTGGA                     |
| Fodrin             | CGCATCTTTTTCTCAGCAG                      | CCAGGACTTGCTGTCTCTC                      |
| Symplekin          | TGAGGGCTGAGAAGGCTGTA                     | CAGCACCTCTGCCTTGAATC                     |
| Tjap1 (7H6)        | CTCCAGAGCACCGAGAGCTA                     | GCGTTTGCGAAGTTCTTCAT                     |
| TLR4               | CGCTTTCACCTCTGCCTTCACTACAG               | ACACTACCACAATAACCTCCGGCTC                |
| AKP3               | ACATTGCTACACAACCTCATCTCC                 | TCCTGCCATCCAATCTGGTTC                    |
| AKP6               | AGGATCCATCTGTCCTTTGGT                    | CAGCTGCCTTCTTGTTC                        |
| Reg3γ              | TTCTGTCTCCATGATCAAA                      | CATCCACCTCTGTTGGGTTC                     |
| mBD-2              | TCTCTGCTCTGCTGCTGATATGC                  | AGGACAAATGGCTCTGACACAGTACC               |
| Ang4               | GCTGGGTCTGGTTGTGATTCC                    | AGGCGAGGTTAGCTTTCTTTCC                   |
| Global α-defensins | GGTGATCATCAGACCCAGCATCAGT                | AAGAGACTAAAACCTGAGGAGCAGC                |
| BPI                | AGCAGGGAGTGGTTGAGT                       | GATGGTGGTGATGTGGC-                       |
| LBP                | GGGTCTGCAGAGAGAGCTGTACAA                 | TAGTTAAGGAATGCCTGGAAC                    |
| CD14               | ACATCTTGAACCTCCGCAAC                     | AGGGTTCCTATCCAGCCTGT                     |
| NLRP3              | AGCCTTCCAGGATCCTCTTC                     | CTTGGGCAGCAGTTTCTTTTC                    |
| ASC                | GAAGCTGCTGACAGTGCAAC                     | GCCACAGCTCCAGACTCTTC                     |
| Caspase-1          | AGATGGCACATTTCCAGGAC                     | GATCCTCCAGCAGCAACTTC                     |
| Pannexin-1         | CTCGGACTTCTTGCTGAAGG                     | TACAGCAGCCCAGCAGTATG                     |
| β-actin            | GAGAAGATCTGGCACCACACC                    | GCATACAGGGACAGCACAGC                     |
|                    | GATTACTGCTCTGGCTCCTAGC                   | GACTCATCGTACTCTGCTTGC                    |

## Supplementary References

1. Kang JX, Wang J, Wu L, Kang ZB. Transgenic mice: fat-1 mice convert n-6 to n-3 fatty acids. *Nature* **427**, 504 (2004).
2. Reikvam DH, *et al.* Depletion of murine intestinal microbiota: effects on gut mucosa and epithelial gene expression. *PLoS One* **6**, e17996 (2011).
3. Bel S, *et al.* Reprogrammed and transmissible intestinal microbiota confer diminished susceptibility to induced colitis in TMF<sup>-/-</sup> mice. *Proc Natl Acad Sci USA* **111**, 4964-4969 (2014).
4. Prizont R, Konigsberg N. Identification of bacterial glycosidases in rat cecal contents. *Dig Dis Sci* **26**, 773-777 (1981).
5. Moss AK, *et al.* Intestinal alkaline phosphatase inhibits the proinflammatory nucleotide uridine diphosphate. *Am J Physiol Gastrointest Liver Physiol* **304**, G597-604 (2013).
6. Peng J, *et al.* Long term effect of gut microbiota transfer on diabetes development. *J Autoimmun* **53**, 85-94 (2014).
7. Campbell EL, *et al.* Resolvin E1-induced intestinal alkaline phosphatase promotes resolution of inflammation through LPS detoxification. *Proc Natl Acad Sci USA* **107**, 14298-14303 (2010).
8. Kaliannan K, *et al.* Intestinal alkaline phosphatase prevents metabolic syndrome in mice. *Proc Natl Acad Sci USA* **110**, 7003-7008 (2013).
9. Alam SN, *et al.* Intestinal alkaline phosphatase prevents antibiotic-induced susceptibility to enteric pathogens. *Ann Surg* **259**, 715-722 (2014).
10. Cowan TE, *et al.* Chronic coffee consumption in the diet-induced obese rat: impact on gut microbiota and serum metabolomics. *J Nutr Biochem* **25**, 489-495 (2014).
11. Louie TJ, *et al.* Fidaxomicin preserves the intestinal microbiome during and after treatment of *Clostridium difficile* infection (CDI) and reduces both toxin reexpression and recurrence of CDI. *Clin Infect Dis* **55 Suppl 2**, S132-142 (2012).
12. Kim KJ, Lee OH, Lee BY. Low-molecular-weight fucoidan regulates myogenic differentiation through the mitogen-activated protein kinase pathway in C2C12 cells. *Br J Nutr* **106**, 1836-1844 (2011).
13. Kang JX, Wang J. A simplified method for analysis of polyunsaturated fatty acids. *BMC Biochem* **6**, 5 (2005).
14. Ghosh S, *et al.* Fish oil attenuates omega-6 polyunsaturated fatty acid-induced dysbiosis and infectious colitis but impairs LPS dephosphorylation activity causing sepsis. *PLoS One* **8**, e55468 (2013).
15. Mohammadi A, Oshaghi EA. Effect of garlic on lipid profile and expression of LXR alpha in intestine and liver of hypercholesterolemic mice. *J Diabetes Metab Disord* **13**, 20 (2014).
16. de La Serre CB, *et al.* Propensity to high-fat diet-induced obesity in rats is associated with changes in the gut microbiota and gut inflammation. *Am J Physiol Gastrointest Liver Physiol* **299**, G440-448 (2010).
17. Zhang C, *et al.* Interactions between gut microbiota, host genetics and diet relevant to development of metabolic syndromes in mice. *ISME J* **4**, 232-241 (2010).
18. Festi D, *et al.* Gut microbiota and metabolic syndrome. *World J Gastroenterol* **20**, 16079-16094 (2006).
19. Riedel CU, *et al.* Anti-inflammatory effects of bifidobacteria by inhibition of LPS-induced NF-kappaB activation. *World J Gastroenterol* **12**, 3729-3735 (2006).
20. Cani PD, *et al.* Selective increases of bifidobacteria in gut microflora improve high-fat-diet-induced diabetes in mice through a mechanism associated with endotoxaemia. *Diabetologia* **50**, 2374-2383 (2007).
21. Everard A, *et al.* Cross-talk between *Akkermansia muciniphila* and intestinal epithelium controls diet-induced obesity. *Proc Natl Acad Sci USA* **110**, 9066-9071 (2013).

22. Anhe FF, *et al.* A polyphenol-rich cranberry extract protects from diet-induced obesity, insulin resistance and intestinal inflammation in association with increased Akkermansia spp. population in the gut microbiota of mice. *Gut* doi:10.1136/gutjnl-2014-307142 (2014).
23. Chen Y, *et al.* Characterization of fecal microbial communities in patients with liver cirrhosis. *Hepatology* **54**, 562-572 (2011).
24. Yu LX, *et al.* Endotoxin accumulation prevents carcinogen-induced apoptosis and promotes liver tumorigenesis in rodents. *Hepatology* **52**, 1322-1333 (2010).
25. Turnbaugh PJ, *et al.* An obesity-associated gut microbiome with increased capacity for energy harvest. *Nature* **444**, 1027-1031 (2006).
26. Demon D, *et al.* Caspase-11 is expressed in the colonic mucosa and protects against dextran sodium sulfate-induced colitis. *Mucosal Immunol* **7**, 1480-1491 (2014).
27. Atarashi K, *et al.* Induction of colonic regulatory T cells by indigenous Clostridium species. *Science* **331**, 337-341 (2011).
28. Bajaj JS, *et al.* Randomised clinical trial: Lactobacillus GG modulates gut microbiome, metabolome and endotoxemia in patients with cirrhosis. *Aliment Pharmacol Ther* **39**, 1113-1125 (2014).
29. Naito E, *et al.* Beneficial effect of oral administration of Lactobacillus casei strain Shirota on insulin resistance in diet-induced obesity mice. *J Appl Microbiol* **110**, 650-657 (2011).
30. Sokol H, *et al.* Faecalibacterium prausnitzii is an anti-inflammatory commensal bacterium identified by gut microbiota analysis of Crohn disease patients. *Proc Natl Acad Sci USA* **105**, 16731-16736 (2008).
31. Cao GT, *et al.* Effects of a probiotic, Enterococcus faecium, on growth performance, intestinal morphology, immune response, and cecal microflora in broiler chickens challenged with Escherichia coli K88. *Poult Sci* **92**, 2949-2955 (2013).
32. Million M, *et al.* Comparative meta-analysis of the effect of Lactobacillus species on weight gain in humans and animals. *Microb Pathog* **53**, 100-108 (2012).
33. Miyoshi M, Ogawa A, Higurashi S, Kadooka Y. Anti-obesity effect of Lactobacillus gasseri SBT2055 accompanied by inhibition of pro-inflammatory gene expression in the visceral adipose tissue in diet-induced obese mice. *Eur J Nutr* **53**, 599-606 (2014).
34. Xin J, *et al.* Preventing non-alcoholic fatty liver disease through Lactobacillus johnsonii BS15 by attenuating inflammation and mitochondrial injury and improving gut environment in obese mice. *Appl Microbiol Biotechnol* **98**, 6817-6829 (2014).
35. Lee SJ, *et al.* The effects of co-administration of probiotics with herbal medicine on obesity, metabolic endotoxemia and dysbiosis: A randomized double-blind controlled clinical trial. *Clin Nutr* **33**, 973-981 (2014).
